# Supplementary material for: Molecular archeological evidence in support of the repeated loss of a papillomavirus gene
Source: PubMed Central journal article supplement (PMC5015084; doi:10.1038/srep33028), 2016-09-08
Supplement: srep33028-s1.pdf [file srep33028-s1.pdf]

## **Legends to the supplemental materials**

### **Supplemental Table 1**

Details of viral genomes used in the phylogenetic tree in Figure 1.

### **Supplemental Table 2**

The reported estimates for the Bayesian dating analysis. Node numbers correspond to figure 2.

### **Supplemental Figure 1**

High resolution, base-pair level version of Figure 3 A.

**Supplemental table 1**

| <b>Virus</b> | <b>Host Species</b> | <b>Viral Species Name<sup>\$</sup></b> | <b>Reference</b>          | <b>Genbank ID</b> |
|--------------|---------------------|----------------------------------------|---------------------------|-------------------|
| HPV4         | Homo sapiens        | Gammapapillomavirus 1                  | Egawa et al., 1993        | X70827            |
| HPV48        | Homo sapiens        | Gammapapillomavirus 2                  | Muller et al., 1989       | U31789            |
| HPV50        | Homo sapiens        | Gammapapillomavirus 3                  | Favre et al., 1989        | U31790            |
| HPV60        | Homo sapiens        | Gammapapillomavirus 4                  | Matsukura et al., 1992    | U31792            |
| HPV65        | Homo sapiens        | Gammapapillomavirus 1                  | Egawa et al., 1993        | X70829            |
| HPV88        | Homo sapiens        | Gammapapillomavirus 5                  | Kullander et al., 2008    | EF467176          |
| HPV95        | Homo sapiens        | Gammapapillomavirus 1                  | Egawa et al., Unpublished | AJ620210          |
| HPV101       | Homo sapiens        | Gammapapillomavirus 6                  | Chen et al., 2007         | DQ080081          |
| HPV103       | Homo sapiens        | Gammapapillomavirus 6                  | Chen et al., 2007         | DQ080078          |
| HPV108       | Homo sapiens        | Gammapapillomavirus 6                  | Nobre et al., 2009        | FM212639          |
| HPV109       | Homo sapiens        | Gammapapillomavirus 7                  | Ekstrom et al., 2010      | EU541441          |
| HPV112       | Homo sapiens        | Gammapapillomavirus 8                  | Ekstrom et al., 2010      | EU541442          |
| HPV116       | Homo sapiens        | Gammapapillomavirus 9                  | Li et al., 2009           | FJ804072          |
| HPV119       | Homo sapiens        | Gammapapillomavirus 8                  | Bernard et al., 2010      | GQ845441          |
| HPV121       | Homo sapiens        | Gammapapillomavirus 10                 | Bernard et al., 2010      | GQ845443          |
| HPV123       | Homo sapiens        | Gammapapillomavirus 7                  | Bernard et al., 2010      | GQ845445          |
| HPV126       | Homo sapiens        | Gammapapillomavirus 11                 | Egawa et al., pres        | AB646346          |
| HPV127       | Homo sapiens        | Gammapapillomavirus 12                 | Schowalter et al., 2010   | HM011570          |
| HPV128       | Homo sapiens        | Gammapapillomavirus 13                 | Koehler et al., 2011      | GU225708          |
| HPV129       | Homo sapiens        | Gammapapillomavirus 9                  | Koehler et al., 2011      | GU233853          |
| HPV130       | Homo sapiens        | Gammapapillomavirus 10                 | Koehler et al., 2011      | GU117630          |
| HPV131       | Homo sapiens        | Gammapapillomavirus 14                 | Koehler et al., 2011      | GU117631          |
| HPV132       | Homo sapiens        | Gammapapillomavirus 12                 | Koehler et al., 2011      | GU117632          |
| HPV133       | Homo sapiens        | Gammapapillomavirus 10                 | Koehler et al., 2011      | GU117633          |
| HPV134       | Homo sapiens        | Gammapapillomavirus 7                  | Koehler et al., 2011      | GU117634          |
| HPV135       | Homo sapiens        | Gammapapillomavirus 15                 | Bottalico et al., 2011    | HM999987          |
| HPV136       | Homo sapiens        | Gammapapillomavirus 11                 | Bottalico et al., 2011    | HM999988          |

|        |              |                        |                               |          |
|--------|--------------|------------------------|-------------------------------|----------|
| HPV137 | Homo sapiens | Gammapapillomavirus 16 | Bottalico et al., 2011        | HM999989 |
| HPV138 | Homo sapiens | Gammapapillomavirus 7  | Chen et al., Unpublished      | HM999990 |
| HPV139 | Homo sapiens | Gammapapillomavirus 7  | Chen et al., Unpublished      | HM999991 |
| HPV140 | Homo sapiens | Gammapapillomavirus 11 | Bottalico et al., 2011        | HM999992 |
| HPV141 | Homo sapiens | Gammapapillomavirus 11 | Bottalico et al., 2011        | HM999993 |
| HPV142 | Homo sapiens | Gammapapillomavirus 10 | Chen et al., Unpublished      | HM999994 |
| HPV144 | Homo sapiens | Gammapapillomavirus 17 | Bottalico et al., 2011        | HM999996 |
| HPV146 | Homo sapiens | Gammapapillomavirus 15 | Chen et al., Unpublished      | HM999998 |
| HPV147 | Homo sapiens | Gammapapillomavirus 8  | Chen et al., Unpublished      | HM999999 |
| HPV148 | Homo sapiens | Gammapapillomavirus 12 | Koehler et al., 2011          | GU129016 |
| HPV149 | Homo sapiens | Gammapapillomavirus 7  | Koehler et al., 2011          | GU117629 |
| HPV153 | Homo sapiens | Gammapapillomavirus 13 | Sturegard et al., Unpublished | JN171845 |
| HPV154 | Homo sapiens | Gammapapillomavirus 11 | Ure and Forslund, Unpublished | JN211193 |
| HPV155 | Homo sapiens | Gammapapillomavirus 7  | Ekstrom et al., 2011          | JF906559 |
| HPV156 | Homo sapiens | Gammapapillomavirus 18 | Chouhy et al., 2013           | JX429973 |
| HPV161 | Homo sapiens | Gammapapillomavirus 19 | Li et al., 2012               | JX413109 |
| HPV162 | Homo sapiens | Gammapapillomavirus 19 | Li et al., 2012               | JX413108 |
| HPV163 | Homo sapiens | Gammapapillomavirus 20 | Li et al., 2012               | JX413107 |
| HPV164 | Homo sapiens | Gammapapillomavirus 8  | Li et al., 2012               | JX413106 |
| HPV165 | Homo sapiens | Gammapapillomavirus 12 | Li et al., 2012               | JX444072 |
| HPV166 | Homo sapiens | Gammapapillomavirus 19 | Li et al., 2012               | JX413104 |
| HPV167 | Homo sapiens | Gammapapillomavirus 21 | Li et al., 2013               | KC862318 |
| HPV168 | Homo sapiens | Gammapapillomavirus 8  | Li et al., 2013               | KC862317 |
| HPV169 | Homo sapiens | Gammapapillomavirus 11 | Li et al., 2012               | JX413105 |
| HPV170 | Homo sapiens | Gammapapillomavirus 7  | Li et al., 2012               | JX413110 |
| HPV171 | Homo sapiens | Gammapapillomavirus 11 | Martin et al., 2013           | KF006398 |
| HPV172 | Homo sapiens | Gammapapillomavirus 22 | Martin et al., 2013           | KF006399 |
| HPV173 | Homo sapiens | Gammapapillomavirus 1  | Martin et al., 2013           | KF006400 |
| HPV175 | Homo sapiens | Gammapapillomavirus 23 | Johansson et al., 2013        | KC108721 |

|             |                  |                        |                              |          |
|-------------|------------------|------------------------|------------------------------|----------|
| HPV178      | Homo sapiens     | Gammapapillomavirus 24 | Johansson and Forslund, 2014 | KJ130020 |
| HPV179      | Homo sapiens     | Gammapapillomavirus 15 | Kocjan et al., Unpublished   | HG421739 |
| HPV180      | Homo sapiens     | Gammapapillomavirus 10 | Johansson et al., 2013       | KC108722 |
| HPV184      | Homo sapiens     | Gammapapillomavirus 25 | Kocjan et al., Unpublished   | HG530535 |
| HPV197      | Homo sapiens     | Gammapapillomavirus 24 | Arroyo et al., Unpublished   | KM085343 |
| HPV199      | Homo sapiens     | Gammapapillomavirus 12 | Ostrbenk et al., Unpublished | KJ913662 |
| HPV-mCG2*   | Homo sapiens     | Gammapapillomavirus    | Sauvage et al., Unpublished  | JF966378 |
| HPV-mCG3*   | Homo sapiens     | Gammapapillomavirus    | Sauvage et al., Unpublished  | JF966379 |
| HPV-mCH2*   | Homo sapiens     | Gammapapillomavirus    | Yu et al., Unpublished       | KF791917 |
| HPV-mFD1*   | Homo sapiens     | Gammapapillomavirus    | Sauvage et al., Unpublished  | JF966375 |
| HPV-mFD2*   | Homo sapiens     | Gammapapillomavirus    | Sauvage et al., Unpublished  | JF966376 |
| HPV-mFI864* | Homo sapiens     | Gammapapillomavirus    | Phan et al., 2013            | KC311731 |
| HPV-mFS1*   | Homo sapiens     | Gammapapillomavirus    | Sauvage et al., Unpublished  | JF966373 |
| HPV-mKC5*   | Homo sapiens     | Gammapapillomavirus    | Li et al., 2012              | JX444073 |
| HPV-mKN1*   | Homo sapiens     | Gammapapillomavirus    | Sauvage et al., Unpublished  | JF966371 |
| HPV-mKN2*   | Homo sapiens     | Gammapapillomavirus    | Sauvage et al., Unpublished  | JF966372 |
| HPV-mKN3*   | Homo sapiens     | Gammapapillomavirus    | Sauvage et al., Unpublished  | JF966374 |
| HPV-mL55*   | Homo sapiens     | Gammapapillomavirus    | Yu et al., 2013              | KF482069 |
| HPV-mSD2*   | Homo sapiens     | Gammapapillomavirus    | Mokili et al., 2013          | KC113191 |
| CPV2        | Canis familiaris | Taupapillomavirus 1    | Yuan et al., 2007            | AY722648 |

\* These non-reference genomes have not been officially recognized by the Papillomavirus reference center.  
 § Papillomavirus classification is performed by the International committee for the taxonomy of viruses. Viruses without a trailing number have not yet been officially designated. The genus classification should be considered preliminary.

**Supplemental table 2**

| node | posterior | height (95% HPD)      | node | posterior | height (95% HPD)      | node | posterior | height (95% HPD)      | node | posterior | height (95% HPD)      |
|------|-----------|-----------------------|------|-----------|-----------------------|------|-----------|-----------------------|------|-----------|-----------------------|
| 1    | 1.00      | 60.64 (50.55 - 72.74) | 20   | 1.00      | 25.09 (21.04 - 29.79) | 39   | 1.00      | 31.00 (26.11 - 36.62) | 58   | 1.00      | 19.32 (16.08 - 23.01) |
| 2    | 1.00      | 57.28 (48.51 - 67.63) | 21   | 1.00      | 14.90 (11.82 - 18.35) | 40   | 1.00      | 25.08 (21.02 - 29.82) | 59   | 1.00      | 11.68 (9.32 - 14.34)  |
| 3    | 1.00      | 23.24 (18.56 - 28.61) | 22   | 1.00      | 23.06 (19.25 - 27.44) | 41   | 1.00      | 22.32 (18.58 - 26.56) | 60   | 1.00      | 12.47 (10.04 - 15.27) |
| 4    | 1.00      | 12.49 (9.54 - 15.67)  | 23   | 1.00      | 18.99 (15.75 - 22.70) | 42   | 1.00      | 15.11 (12.34 - 18.21) | 61   | 1.00      | 23.66 (19.68 - 28.27) |
| 5    | 1.00      | 54.56 (46.24 - 64.30) | 24   | 1.00      | 10.20 (8.05 - 12.64)  | 43   | 1.00      | 12.42 (9.97 - 15.15)  | 62   | 1.00      | 19.71 (16.13 - 23.83) |
| 6    | 1.00      | 26.91 (22.19 - 32.48) | 25   | 1.00      | 15.22 (12.35 - 18.48) | 44   | 1.00      | 10.80 (8.45 - 13.52)  | 63   | 0.96      | 43.36 (36.77 - 51.11) |
| 7    | 1.00      | 19.80 (16.54 - 23.61) | 26   | 1.00      | 22.16 (18.23 - 26.63) | 45   | 1.00      | 30.42 (25.17 - 36.50) | 64   | 0.80      | 41.07 (34.71 - 48.43) |
| 8    | 1.00      | 16.69 (13.59 - 20.24) | 27   | 1.00      | 18.67 (15.17 - 22.73) | 46   | 1.00      | 39.26 (33.32 - 46.25) | 65   | 1.00      | 16.67 (13.59 - 20.10) |
| 9    | 1.00      | 17.19 (14.30 - 20.54) | 28   | 1.00      | 33.40 (28.01 - 39.59) | 47   | 1.00      | 31.93 (26.93 - 37.94) | 66   | 1.00      | 10.41 (8.12 - 13.06)  |
| 10   | 1.00      | 15.33 (12.69 - 18.38) | 29   | 1.00      | 18.30 (15.17 - 21.93) | 48   | 1.00      | 18.84 (15.05 - 23.06) | 67   | 1.00      | 10.50 (8.27 - 13.01)  |
| 11   | 1.00      | 10.80 (8.64 - 13.32)  | 30   | 1.00      | 16.01 (13.23 - 19.22) | 49   | 1.00      | 21.13 (17.44 - 25.41) | 68   | 1.00      | 25.51 (20.92 - 30.74) |
| 12   | 1.00      | 10.41 (8.33 - 12.78)  | 31   | 1.00      | 13.00 (10.63 - 15.71) | 50   | 1.00      | 17.88 (14.66 - 21.67) | 69   | 1.00      | 21.48 (17.52 - 26.10) |
| 13   | 1.00      | 48.94 (41.65 - 57.70) | 32   | 1.00      | 9.24 (7.37 - 11.38)   | 51   | 1.00      | 12.43 (9.89 - 15.35)  | 70   | 1.00      | 10.62 (8.57 - 12.99)  |
| 14   | 1.00      | 45.25 (38.55 - 53.38) | 33   | 1.00      | 37.29 (31.40 - 44.14) | 52   | 1.00      | 33.72 (28.48 - 39.78) | 71   | 1.00      | 6.67 (5.18 - 8.30)    |
| 15   | 1.00      | 43.16 (36.70 - 50.82) | 34   | 1.00      | 31.86 (26.50 - 37.87) | 53   | 1.00      | 30.11 (25.41 - 35.57) | 72   | 1.00      | 16.66 (13.72 - 20.03) |
| 16   | 1.00      | 41.83 (35.57 - 49.30) | 35   | 1.00      | 15.00 (12.04 - 18.32) | 54   | 1.00      | 24.48 (20.54 - 28.93) | 73   | 1.00      | 14.26 (11.71 - 17.22) |
| 17   | 0.99      | 40.45 (34.38 - 47.75) | 36   | 1.00      | 7.91 (6.18 - 9.96)    | 55   | 0.60      | 22.70 (19.05 - 26.87) | 74   | 1.00      | 10.09 (8.07 - 12.42)  |
| 18   | 1.00      | 31.36 (26.42 - 37.08) | 37   | 1.00      | 41.24 (35.14 - 48.67) | 56   | 1.00      | 13.76 (11.07 - 16.82) | 75   | 1.00      | 6.53 (5.04 - 8.18)    |
| 19   | 1.00      | 27.23 (22.83 - 32.25) | 38   | 1.00      | 36.89 (31.18 - 43.46) | 57   | 1.00      | 3.16 (2.41 - 3.99)    |      |           |                       |
